# Supplementary material for: Gendered medicinal plant knowledge contributions to adaptive capacity and health sovereignty in Amazonia
Source: PubMed Central journal article supplement (PMC5120019; doi:10.1007/s13280-016-0826-1), 2016-11-22
Supplement: 13280_2016_826_MOESM1_ESM.pdf [file 13280_2016_826_MOESM1_ESM.pdf]

***Ambio***

Electronic Supplementary Material

*This supplementary material has not been peer reviewed.*

**Title: Gendered medicinal plant knowledge contributions to adaptive capacity and health sovereignty in Amazonia**

Authors: Díaz-Reviriego, I. Fernández-Llamazares, Á., Salpeteur, M. Howard, P.L,  
Reyes-García, V.

**Supplementary material.** Correspondence of vernacular with scientific names

| <b>Vernacular name</b> | <b>Scientific name</b>                                   | <b>Taxonomic family</b> |
|------------------------|----------------------------------------------------------|-------------------------|
| apainiqui              | <i>Pera benensis</i> (Rusby)                             | Euphorbiaceae           |
| arara                  | <i>Urera laciniata</i> (Goudot)<br>Wedd <i>urticaria</i> | Urticaceae              |
| ashashaj               | <i>Citrus limon</i> (L.) Burn                            | Rutaceae                |
| Ava' ava'              | <i>Prockia crucis</i> L.                                 | Salicaceae              |
| banana                 | <i>Musa x acuminata</i>                                  | Musaceae                |
| bätin                  | <i>Syagrus sancona</i> Karsten                           | Palmae                  |
| bejqui                 | <i>Hymenaea courbaril</i> L.                             | Leguminosae-Cae         |
| buisi                  | <i>Entada</i> sp.                                        | Leguminosae-Mim         |
| caji'si                | <i>Martinella ovovata</i> (H.B.K)<br>Bureau & Schumann   | Bignoniaceae            |
| cam                    | <i>Otoba parvifolia</i><br>(Markgraf) A. Gentry          | Myristicaceae           |
| canau                  |                                                          |                         |
| cashcaria              | <i>Cinchona</i> cf. <i>Officinalis</i> L.                | Rubiaceae               |
| cata                   |                                                          |                         |
| ca' babas              | <i>Olyra latifolia</i>                                   | Gramineae               |
| chij                   | <i>Triplaris americana</i> L.                            | Polygonaceae            |
| chito                  | <i>Tephrosia vogelii</i> J. D.<br>Leguminosae-Pap        | Leguminosae-Pap         |

---

|             |                                                                                     |               |
|-------------|-------------------------------------------------------------------------------------|---------------|
| chorecho'   | <i>Aniba canelilla</i> (H.B.K.) Mez                                                 | Lauraceae     |
| chujbubuty  | <i>Peperomia rotundifolia</i> (L.)<br>Kunth                                         | Piperaceae    |
| chura'      | <i>Swietenia macrophylla</i> (King)                                                 | Meliaceae     |
| conojfoto   | <i>Hura crepitans</i> L.                                                            | Euphorbiaceae |
| copaiva     | <i>Copaifera reticulata</i> Ducke                                                   | Fabaceae      |
| cos         | <i>Nicotina tabacum</i>                                                             | Solanaceae    |
| coti'       | <i>Psidium guajava</i> L.                                                           | Myrtaceae     |
| cravu       |                                                                                     |               |
| curi        | <i>Lantana cf. Aristat</i>                                                          | Verbenaceae   |
| curu        |                                                                                     |               |
| dyesatdyes  | <i>Baccharis trinervis</i> (Lam)<br>Pers.                                           | Compositae    |
| ere'        | <i>Petiveria alliacea</i> L.                                                        | Piperaceae    |
| ibiñe       |                                                                                     |               |
| ijmeme      | <i>Myrcia fallax</i>                                                                | Myrtaceae-Leg |
| irepij      | <i>Ocimum micranthum</i> Willd.                                                     | Labiatae      |
| itsi        | <i>Picramnia aff. Sellowii</i><br>Planchan subsp <i>sprucanea</i><br>(Engl.) Pirari | Simaroubaceae |
| jamo'tarara | <i>Margarita nobilis</i> L.F                                                        | Euphorbiaceae |
| macha       | <i>Amburana caerensis</i>                                                           | Fabaceae      |
| manai       | <i>Attalea phalerata</i> C. Martius<br>ex Sprengel                                  | Palmae        |

---

---

|             |                                                  |                 |
|-------------|--------------------------------------------------|-----------------|
| marva       | <i>Sida rhombifolia</i> L                        | Malvaceae       |
| maschaty    |                                                  |                 |
| mature      | <i>Acmella oleracea</i>                          | Compositae      |
| merique     | <i>Ananas comosus</i>                            | Bromeliaceae    |
| mojmosh     |                                                  |                 |
| morifi      | <i>Dichorisandra</i> sp.                         | Commelinaceae   |
| nashdyes    |                                                  |                 |
| orotas      |                                                  |                 |
| oteti       |                                                  | Amarilliadaceae |
| oveto       | <i>Uncaria guianensis</i> (Aubl.)                | Rubiaceae       |
| oyoj' oyoj  | <i>Urvillea</i> sp.                              | Sapindaceae     |
| parta       | <i>Persea americana</i> C. Miller                | Laureaceae      |
| potona      | <i>Kalanchoe pinnata</i> (Lamark)<br>Persoon     | Crasulaceae     |
| punuvacdyes |                                                  |                 |
| que'tsetsej | <i>Davilla nitida</i> (Vahl) Kubitzki            | Dilleniaceae    |
| rovocdyes   |                                                  |                 |
| saute       | <i>Zingiber officinale</i>                       | Zingiberaceae   |
| sebiria     | <i>Cymbopogon citratus</i>                       | Gramineae       |
| shepi       | <i>Gallesia integrifolia</i><br>(Sprengel) Harms | Phytolaccaceae  |
| shepi'is    | <i>Mansoa alliacea</i> (Lamark) A.<br>Gentry     | Bignoniaceae    |
| shiveñi     |                                                  |                 |

---

---

|              |                                     |                |
|--------------|-------------------------------------|----------------|
| siyamo       | <i>Cedrela odorata</i> L.           | Meliaceae      |
| sicoco       | <i>Chenopodium ambrosioides</i>     | Chenopodiaceae |
| tamtac       | <i>Galipea longiflora</i> K. Krause | Rutaceae       |
| tiribui      |                                     |                |
| titij        | <i>Ficus insipida</i> Willd         | Moraceae       |
| tson' sonty  | <i>Ampelocera edentula</i> Kuhml    | Ulmaceae       |
| tubuij       | <i>Gouania adenophora</i>           | Rhamnaceae     |
| tyi'         | <i>Genipa americana</i> L.          | Rubiaceae      |
| tyi' mujmure | <i>Piper pelatum</i> Ruiz&Pay       | Piperaceae     |
| ufajre       | <i>Brugmansia arborea</i> (L.)      | Solanaceae     |
| undy         |                                     |                |
| u'puyu       | <i>Piper laevigatum</i> Kunth       | Piperaceae     |
| vambason     | <i>Aspidosperma rigidum</i>         | Apocinaceae    |
| vashi        | <i>Serjania caracasana</i>          | Sapindaceae    |
| vayori       | <i>Sparattanthelium glabrum</i>     | Hernandiaceae  |
| vijsi        |                                     |                |
| viyucure     |                                     |                |
| vujnare      |                                     |                |
| yäcäni       |                                     |                |
| yän          |                                     |                |
| yantes       |                                     |                |
| yavitus      |                                     |                |

---

## **References consulted for linking vernacular names with scientific names**

- Guéze, M. 2011. Evaluation of tree diversity and utilization: the role of acculturation. A case study in the Bolivian Amazon. PhD Thesis, Institut de Ciència i Tecnologia Ambientals, Universitat Autònoma de Barcelona.
- Huanca, T. 1999. Tsimane' Indigenous Knowledge. Swidden Fallow Management and Conservation. PhD Thesis, University of Florida
- Reyes-García, V. 2001. Indigenous people, ethnobotanical knowledge, and market economy. A case study of the Tsimane' Amerindians in lowland Bolivia. PhD Thesis, University of Florida
- Ticona, J.P. 2010. Los chimane: conocimiento y uso de plantas medicinales en la comunidad de Tacuaral del Matos, Provincia Ballivian, Departamento del Beni. Bachelor Thesis, Universidad Mayor de San Andrés.
